1           **Comprehensive epigenome characterization reveals**  
2           **diverse transcriptional regulation across human**  
3           **vascular endothelial cells**

4  
5   Ryuichiro Nakato<sup>1,2,\*</sup>, Youichiro Wada<sup>2,3,\*</sup>, Ryo Nakaki<sup>4</sup>, Genta Nagae<sup>2,4</sup>, Yuki Katou<sup>5</sup>,  
6   Shuichi Tsutsumi<sup>4</sup>, Natsu Nakajima<sup>1</sup>, Hiroshi Fukuhara<sup>6</sup>, Atsushi Iguchi<sup>7</sup>, Takahide  
7   Kohro<sup>8</sup>, Yasuharu Kanki<sup>2,3</sup>, Yutaka Saito<sup>2,9,10</sup>, Mika Kobayashi<sup>3</sup>, Akashi Izumi-Taguchi<sup>3</sup>,  
8   Naoki Osato<sup>2,11</sup>, Kenji Tatsuno<sup>4</sup>, Asuka Kamio<sup>4</sup>, Yoko Hayashi-Takanaka<sup>2,12</sup>, Hiromi  
9   Wada<sup>3,13</sup>, Shinzo Ohta<sup>13</sup>, Masanori Aikawa<sup>14</sup>, Hiroyuki Nakajima<sup>7</sup>, Masaki Nakamura<sup>6</sup>,  
10   Rebecca C. McGee<sup>15</sup>, Kyle W. Heppner<sup>15</sup>, Tatsuo Kawakatsu<sup>16</sup>, Michiru Genno<sup>16</sup>,  
11   Hiroshi Yanase<sup>16</sup>, Haruki Kume<sup>6</sup>, Takaaki Senbonmatsu<sup>17</sup>, Yukio Homma<sup>6</sup>, Shigeyuki  
12   Nishimura<sup>17</sup>, Toutai Mitsuyama<sup>2,9</sup>, Hiroyuki Aburatani<sup>2,4</sup>, Hiroshi Kimura<sup>2,12</sup>, Katsuhiko  
13   Shirahige<sup>2,5</sup>

14  
15   <sup>1</sup>Laboratory of Computational Genomics, Institute for Quantitative Biosciences, The  
16   University of Tokyo, Tokyo, 113-0032, Japan

17   <sup>2</sup>Japan Agency for Medical Research and Development (AMED-CREST), AMED, 1-7-1  
18   Otemachi, Chiyoda-ku, Tokyo 100-0004, Japan

19   <sup>3</sup>Isotope Science Center, The University of Tokyo, Tokyo, 113-0032, Japan

20   <sup>4</sup>Genome Science Division, Research Center for Advanced Science and Technology,  
21   The University of Tokyo, Tokyo, 153-8904, Japan

22   <sup>5</sup>Laboratory of Genome Structure and Function, Institute for Quantitative Biosciences,  
23   The University of Tokyo, Tokyo, 113-0032, Japan

24   <sup>6</sup>Department of Urology, Graduate School of Medicine, The University of Tokyo, Tokyo  
25   113-8655, Japan

26   <sup>7</sup>Department of Cardiovascular Surgery, Saitama Medical University International  
27   Medical Center, Saitama 350-1298, Japan

28   <sup>8</sup>Department of Clinical Informatics, Jichi Medical University School of Medicine,  
29   Shimotsuke, 329-0498, Japan

30 <sup>9</sup>Artificial Intelligence Research Center, National Institute of Advanced Industrial  
31 Science and Technology (AIST), 2-4-7 Aomi, Koto-ku, Tokyo 135-0064, Japan

32 <sup>10</sup>Computational Bio Big-Data Open Innovation Laboratory (CBBDOIL), National  
33 Institute of Advanced Industrial Science and Technology (AIST), 3-4-1 Okubo,  
34 Shinjuku-ku, Tokyo 169-8555, Japan

35 <sup>11</sup>Graduate School of Information Science and Technology, Osaka University, Suita,  
36 565-0871, Japan

37 <sup>12</sup>Cell Biology Center, Institute of Innovative Research, Tokyo Institute of Technology,  
38 Yokohama, 226-8503, Japan

39 <sup>13</sup>Brain Attack Center, Ohta Memorial Hospital, Fukuyama, 720-0825, Japan

40 <sup>14</sup>The Center for Excellence in Vascular Biology and the Center for Interdisciplinary  
41 Cardiovascular Sciences, Cardiovascular Division and Channing Division of Network  
42 Medicine, Brigham and Women's Hospital, Harvard Medical School, Boston, MA, 02115,  
43 USA

44 <sup>15</sup>Lifeline Cell Technology, Frederick, MD 21701, USA

45 <sup>16</sup>Bio-Medical Department, KURABO INDUSTRIES LTD., Neyagawa, Osaka 572-0823,  
46 Japan

47 <sup>17</sup>Department of Cardiology, Saitama Medical University International Medical Center,  
48 Saitama 350-1298, Japan

49

50 \*These authors contributed equally to this work.

51

## 52 **Contact**

53 Corresponding authors: [rnakato@iam.u-tokyo.ac.jp](mailto:rnakato@iam.u-tokyo.ac.jp) (R.N.); [ywada-tky@umin.ac.jp](mailto:ywada-tky@umin.ac.jp)  
54 (Y.W.); [hkimura@bio.titech.ac.jp](mailto:hkimura@bio.titech.ac.jp) (H.K.); [kshirahi@iam.u-tokyo.ac.jp](mailto:kshirahi@iam.u-tokyo.ac.jp) (K.S.)

55

56

57 **ABSTRACT**

58 **Background:** Endothelial cells (ECs) make up the innermost layer throughout the entire  
59 vasculature. Their phenotypes and physiological functions are initially regulated by  
60 developmental signals and extracellular stimuli. The underlying molecular mechanisms  
61 responsible for the diverse phenotypes of ECs from different organs are not well  
62 understood.

63 **Results:** To characterize the transcriptomic and epigenomic landscape in the vascular  
64 system, we cataloged gene expression and active histone marks in nine types of human  
65 ECs (generating 148 genome-wide datasets) and carried out a comprehensive analysis  
66 with chromatin interaction data. We identified 3,765 EC-specific enhancers, some of  
67 which were associated with disease-associated genetic variations. We also identified  
68 various candidate marker genes for each EC type. Notably, reflecting the developmental  
69 origins of ECs and their roles in angiogenesis, vasculogenesis and wound healing.

70 **Conclusions:** While the importance of several HOX genes for early vascular  
71 development and adult angiogenesis in pathological conditions has been reported, a  
72 systematic analysis of the regulation and roles of HOX genes in mature tissue cells has  
73 been lacking. These datasets provide a valuable resource for understanding the  
74 vascular system and associated diseases.

75

76 **Keywords:** Endothelial cells, Histone modifications, Epigenome database, ChIP-seq,  
77 Large-scale analysis

78

79

## 80 INTRODUCTION

81 Endothelial cells (ECs), which make up the innermost blood vessel lining of the  
82 body, express diverse phenotypes that affect their morphology, physiological function  
83 and gene expression patterns in response to the extracellular environment, including  
84 the oxygen concentration, blood pressure and physiological stress. In the kidney, for  
85 example, the vascular bed plays a role in the filtration of blood; in the brain, however,  
86 the vascular architecture protects the central nervous system from toxins and other  
87 components of the blood (1). Endothelial heterogeneity is mainly dependent on both the  
88 function of each organ and the developmental lineage of different EC populations, which  
89 result in adaptation to the vascular microenvironment. It is widely recognized that  
90 certain specific vessels are susceptible to pathological changes, which include those  
91 related to atherosclerosis and inflammation (2). Atherosclerosis, which occurs in the  
92 muscular and elastic arteries, is a progressive disease characterized by the  
93 accumulation of macrophages, and this process is initiated by the expression of cell  
94 adhesion molecules, such as P-selectin. In mice, the expression level of P-selectin is  
95 higher in the lung and mesentery vesicles compared with the heart, brain, stomach and  
96 muscle (3).

97 In clinical practice, the thoracic, radial and gastroepiploic arteries are used for  
98 coronary bypass grafts because these arteries have no tendency toward  
99 atherosclerosis and hence are therapeutically advantageous in patients with coronary  
100 artery plaques (4). In addition, the long-lasting results from coronary bypass graft  
101 surgery indicate that vessels transplanted to a new environment differ in their outcome  
102 based on their origin as an artery or vein (5, 6). Although the elucidation of the  
103 molecular mechanisms underlying EC heterogeneity is critically important for the  
104 development of vascular bed-specific remedies, these mechanisms have remained  
105 largely unknown because ECs do not display such heterogeneity when cultured *in vitro*.

106 Epigenetic variation is a prime candidate for controlling the heterogeneity among  
107 various ECs. Increasing evidence supports the idea that certain site-specific  
108 characteristics are epigenetically regulated and easily altered by changes in the human  
109 extracellular microenvironment. Previous gene expression studies of many types of  
110 human ECs in culture demonstrated that site-specific epigenetic modifications play an

111 important role in differential gene expression (7). Moreover, our recent reports  
112 elucidated that there are different histone modifications present in the same genomic  
113 loci, such as *GATA6*, in human umbilical vein endothelial cells (HUVECs) and human  
114 dermal microvascular endothelial cells (HMVECs) (8, 9). Despite the discovery of these  
115 important insights, we still lack a systematic understanding of how the epigenomic  
116 landscape contributes to EC phenotype and heterogeneity. Therefore, there is a great  
117 demand for a comprehensive epigenomic catalog of the various EC types.

118 As a part of the International Human Epigenome Consortium (IHEC) project (10),  
119 we collected Chromatin immunoprecipitation followed by sequencing (ChIP-seq) data  
120 for the active histone modifications trimethylated H3 at Lys4 (H3K4me3) and acetylated  
121 H3 at Lys27 (H3K27ac) in EC DNA from nine different vascular cell types from multiple  
122 donors. We implemented large-scale comparative ChIP-seq analysis of these datasets  
123 to understand how the diverse phenotypes of ECs are regulated by key genes. All  
124 datasets used in this study are publicly available and are summarized on our website  
125 (<https://rnakato.github.io/HumanEndothelialEpigenome/>).

126

## 127 **RESULTS**

### 128 **Reference epigenome generation across EC types**

129 To establish an epigenetic catalog for different EC types, we generated a total  
130 of 491 genome-wide datasets, consisting of 424 histone modification ChIP-seq and 67  
131 paired-end RNA sequencing (RNA-seq) datasets, encompassing a total of 22.3 billion  
132 sequenced reads. ECs were maintained as primary cultures with a physiological  
133 concentration of vascular endothelial growth factor (VEGF) and a minimal number of  
134 passages (fewer than six). We generated genome-wide normalized coverage tracks  
135 and peaks for ChIP-seq data and estimated normalized gene expression values for  
136 RNA-seq data.

137 In this study, we selected a subset of 33 EC samples (131 datasets) as a  
138 representative set comprising nine types of vessels from the human body (Figure 1A):

- 139 ● Human aortic endothelial cells (HAoECs),
- 140 ● Human coronary artery endothelial cells (HCoAECs),
- 141 ● Human endocardial cells (HENDCs),

- 142 ● Human pulmonary artery endothelial cells (HPAECs),
- 143 ● Human umbilical vein endothelial cells (HUVECs),
- 144 ● Human umbilical artery endothelial cells (HUAECs),
- 145 ● Human common carotid artery endothelial cells (HCCaECs),
- 146 ● Human renal artery endothelial cells (HRAECs),
- 147 ● Human great saphenous vein endothelial cells (HGSVECs).

148 The detail of 33 EC samples is summarized in Supplementary Table S1.

149 Among the structures lined by these nine EC types, a group of two aortic, six  
150 common carotid and three coronary arteries is known as the “systemic arteries” and  
151 harbors arterial blood with 100 mmHg of oxygen tension and blood pressure in a range  
152 from 140 mmHg to 60 mmHg. Data sets for each cell type comprise samples from  
153 multiple donors, all of which achieved high-quality values as evaluated below. Here we  
154 focused on two histone modifications, H3K4me3 and H3K27ac (Figure 1B), which are  
155 the key markers of active promoters and enhancers (11). Because both H3K4me3 and  
156 H3K27ac exhibit strong, sharp peaks with ChIP-seq analysis, they are more suitable for  
157 identifying shared and/or unique features across EC cell types as compared with other  
158 histone modifications that show broad peaks, such as H3K9me3.

159

### 160 **Quality validation**

161 To evaluate the quality of obtained ChIP-seq data, we computed a variety of  
162 quality control measures (Supplementary Table S2), including the number of uniquely  
163 mapped reads, library complexity (the fraction of nonredundant reads), GC-content of  
164 mapped reads, genome coverage (the fraction of overlapped genomic areas with at  
165 least one mapped read), the number of peaks, signal-to-noise ratio (S/N) by the  
166 normalized strand coefficient (12), read-distribution bias measured by background  
167 uniformity (12), inter-sample correlation for each EC type and genome-wide correlation  
168 of read density across all-by-all pairs (Supplementary Figure S1). In addition, the peak  
169 distribution around several known positive/negative marker genes was visually  
170 inspected. Low-quality datasets were not used for further analyses.

171 To further validate the reliability of our data, we evaluated the consistency  
172 between the obtained peaks from ChIP-seq and the gene expression values from  
173 corresponding RNA-seq data. We applied a bivariate regression model (13) to estimate

174 the expression level of all genes based on H3K4me3 and H3K27ac peaks and then  
175 calculated the Pearson correlation between the estimated and the observed expression  
176 levels from ChIP-seq and RNA-seq, respectively. We used data derived from IMR90  
177 fibroblasts analyzed with the same antibodies as a negative control, and we confirmed  
178 that peak distribution of the ChIP-seq data was highly correlated with corresponding  
179 RNA-seq data for ECs, but not with IMR90 data (Figure 1C, Supplementary Figure S2  
180 for the full matrix). Therefore, our ChIP-seq data are likely to represent the histone  
181 modification states of ECs for annotation.

182

### 183 **Identification of active promoter and enhancer sites**

184 We used H3K4me3 and H3K27ac ChIP-seq peaks to define “active promoter  
185 (H3K4me3 and H3K27ac)” and “enhancer (H3K27ac only)” sites for each sample  
186 (Figure 1B, left). Then we assembled them and defined the common sites among all  
187 samples of a given EC type as the reference sites, to avoid differences among  
188 individuals. Finally, the reference sites of all nine EC types were merged into a single  
189 reference set for ECs (Figure 1B, right). We identified 9,121 active promoter sites (peak  
190 width, 2840.8 bp on average) and 23,202 enhancer sites (peak width, 1799.4 bp on  
191 average). The averaged peak width became relatively wide due to the merging of  
192 multiple contiguous sites.

193 We compared the distribution of the reference sites with gene annotation  
194 information. As expected, active promoter sites were enriched in the transcription start  
195 sites (TSSs) of genes, whereas enhancer sites were more frequently dispersed in  
196 introns and intergenic regions (Supplementary Figure S3). Among the enhancers,  
197 15,625 (67.3%) were distally located (more than 10 kbp away from the nearest TSSs).  
198 The number of enhancer sites was more varied among the nine tissue types, whereas  
199 the number of active promoter sites was comparable across the EC types (Figure 2A,  
200 upper panel). The large number of HUAEC enhancer sites is possibly due to the small  
201 number of samples (two) and a relatively small individual difference (both samples were  
202 from newborns). We also evaluated the shared ratio of promoter and enhancer sites  
203 across all EC types (Figure 2A, lower panel). We found that nearly 80% of the active  
204 promoter sites were shared among multiple EC types. In contrast, 57.7% of the

205 enhancers were specific to up to two EC types, suggesting that their more diverse  
206 distribution across EC types relative to active promoter sites contributes to the EC  
207 type-specific regulatory activity. These observations are consistent with previous  
208 studies for other cell lines (11, 14).

209

### 210 **Evaluation of enhancer sites by PCA**

211 To investigate the diverse distribution of our reference enhancer sites, we used  
212 the principal component analysis (PCA) based on the H3K27ac read densities in the  
213 integrated EC enhancer sites with the 117 cell lines from the Roadmap Epigenomics  
214 Project (14). We found that ECs were well clustered and separated from other cell lines  
215 (Figure 2B). Remarkably, HUVECs represented in the Roadmap Epigenomics Project  
216 dataset, termed E122, were properly included in the EC cluster (red circle). In contrast,  
217 IMR90 cells from our study were included in the non-EC cluster (blue circle). This result  
218 supported the reliability of our EC-specific enhancer profiling. It should be noted,  
219 however, that the samples for each EC cell type (indicated by different colors) were not  
220 well clustered, possibly because the EC type-specific difference is minuscule and is  
221 disrupted by differences at the level of the individual.

222

### 223 **Identification of enhancer-promoter interactions by ChIA-PET**

224 We sought to identify the corresponding gene for the reference enhancer sites  
225 and used chromatin loop data obtained from the Chromatin Interaction Analysis by  
226 Paired-End Tag Sequencing (ChIA-PET) data using RNA Polymerase II (Pol II) in  
227 HUVECs. We identified 292 significant chromatin loops (false discovery rate (FDR) <  
228 0.05), 49.3% (144 loops) of which connected promoter and enhancer sites. Even when  
229 we used all chromatin loops (at least one read pair), 27.4% (8,782 of 31,997) of them  
230 linked to enhancer-promoter sites. Remarkably, 48.1% (4,228 of 8,782) of loops  
231 connected the distal enhancer sites. In total, we identified 2,686 distal enhancer sites  
232 that are connected by chromatin loops. We also detected enhancer-enhancer (3,136,  
233 9.8%) and promoter-promoter (11,618, 36.3%) loops, suggesting physically aggregated  
234 chromatin hubs in which multiple promoters and enhancers interact (15). As the  
235 ChIA-PET data are derived from RNA Pol II-associated loops in HUVECs, chromatin  
236 interactions in active genes could be detected.



237

### 238 **Identification of EC-specific sites**

239           Next, we identified EC-specific enhancer sites by excluding any sites from our  
240 reference sites that overlapped with those of our IMR90 cells and other cell types from  
241 the Roadmap Epigenomics Project, except HUVECs (E122). As a result, we obtained  
242 3,765 EC-specific enhancer sites (Supplementary Table S3), some of which were  
243 located around known marker genes of ECs with chromatin loops. One example is  
244 kinase insert domain receptor (*KDR*; Figure 2C, left), which functions as the VEGF  
245 receptor, causing endothelial proliferation, survival, migration, tubular morphogenesis  
246 and sprouting (16). The TSS of *KDR* was marked as an active promoter (enriched for  
247 both H3K4me3 and H3K27ac) and physically interacted with the EC-specific enhancer  
248 sites indicated by H3K27ac, ~50 kbp upstream and downstream of the TSS. Another  
249 example is intercellular adhesion molecule 2 (*ICAM2*, Figure 2C, right), which is an  
250 endothelial marker and is involved in the binding to white blood cells that occurs during  
251 the antigen-specific immune response (17). This gene has two known TSSs, both of  
252 which were annotated as active promoters in ECs, and one TSS that was EC specific  
253 (black arrow). This EC-specific TSS did not have a ChIA-PET interaction, and, likewise,  
254 the enhancer sites within the entire gene body did not directly interact with the adjacent  
255 promoter sites, implying the distinctive regulation of the two *ICAM2* promoters.

256

### 257 **Genome-wide association study (GWAS) enrichment analysis**

258           To explore the correlation of EC-specific reference enhancer sites with  
259 sequence variants associated with disease phenotypes, we obtained reference GWAS  
260 single-nucleotide polymorphisms (SNPs) from the GWAS catalog (18) and identified  
261 significantly enriched loci by permutation analysis (19). Notably, we identified 67  
262 enhancer sites that markedly overlapped with GWAS SNPs associated with “heart”,  
263 “coronary” and “cardiac” (Z score > 5.0, Supplementary Table S4). The most notable  
264 region was around *CALCRL* and *TFPI* loci (chr2:188146468-188248446, Figure 2D).  
265 The EC-specific enhancer region in these loci contained four GWAS risk variants  
266 (Figure 2D, red triangles), three of which are associated with coronary artery/heart  
267 disease (20, 21). Another example is the *RSPO3* locus (Supplementary Figure S4). The

268 upstream distal enhancer regions of that gene contained four GWAS SNPs that are  
269 associated with cardiovascular disease and blood pressure (22, 23).

270

### 271 **Functional analysis of the reference sites**

272 We next investigated whether any characteristic sequence feature is observed in the  
273 EC-specific enhancer and promoter sites (Supplementary Figure S5). We found a  
274 putative motif for EC-specific enhancer sites, which is closely similar to the canonical  
275 motifs of the homeobox genes *bcd*, *oc*, *Gsc* and *PITX1,2,3* (Figure 3). In fact, most of  
276 the EC-specific enhancer sites consisted of enhancers of HGSVECs (47.0%), HRAECs  
277 (37.4%) and HUAECs (68.3%) (Supplementary Figure S6), suggesting that these  
278 enhancers contain this motif.

279 We also looked into the Gene Ontology (GO) classifications under Biological  
280 Process for the enhancer sites using GREAT (24) and found that the enhancer sites  
281 (both all sites and EC-specific sites) have GO terms that are more specific to the  
282 vascular system (e.g., platelet activation, myeloid leukocyte activation and  
283 vasculogenesis), as compared with active promoter sites (e.g., mRNA catabolic process,  
284 Supplementary Figure S7). This also suggests that the enhancer sites are more likely to  
285 be associated with EC-specific functions, whereas promoter sites are also correlated  
286 with the more common biological functions.

287

### 288 **Differential analysis and clustering across EC types**

289 One important issue of this study is to clarify the epigenomic/transcriptomic  
290 diversity across EC cell types. To circumvent variances at the level of the individual in  
291 each cell type observed (Figure 2C) and different S/N ratios, we fitted the value of peak  
292 intensity on the reference enhancer sites among samples using generalized linear  
293 models with the quantile normalization. By implementing a PCA, we confirmed that  
294 different cell samples in the same EC type were properly clustered (Figure 4A). The  
295 PCA also showed that different EC types can be divided into two subgroups based on  
296 the epigenomic landscape, corresponding to upper body (HAoEC, HCoAEC, HPAEC,  
297 HCCaEC and HENDC, purple circle) and lower body (HUVEC, HUAEC, HGSVEC and  
298 HRAEC) origins. A PCA based on gene expression data showed similar results to that  
299 based on the H3K27ac profile, although in the gene expression analysis HUAECs were

300 more similar to heart ECs (Supplementary Figure S8).

301 To further investigate this tendency, we implemented a multiple-group  
302 differential analysis with respect to H3K4me3, H3K27ac and gene expression data to  
303 obtain sites and genes whose values were significantly varied between any of the nine  
304 cell types. With the threshold  $FDR < 1e-5$ , we identified 753 differential H3K4me3 sites  
305 (differential promoters, DPs; 8.3% from 9,121 active promoter sites), 2,979 differential  
306 H3K27ac sites (differential enhancers, DEs; 9.2% from 32,323 active promoter and  
307 enhancer sites) and 879 differentially expressed genes (DEGs; 2.1% from 41,880  
308 genes). As expected, DPs and DEs were more enriched around DEGs, as compared  
309 with all genes. DPs were enriched within ~10 kbp from TSSs, whereas DEs were more  
310 broadly distributed (~100 kbp) (Supplementary Figure S9), indicative of the  
311 longer-range interactions between enhancers and their corresponding genes.

312 We then implemented k-means clustering ( $k = 6$ ) to characterize the overall  
313 variability of DEGs, DEs (Figure 4B) and DPs (Supplementary Figure S10). Although  $k$   
314 = 6 was empirically defined and might not be biologically optimal to classify the nine EC  
315 types, the results could capture the differential patterns. The upregulated genes were  
316 roughly categorized into upper and lower body-specific EC types (Figure 4B), even  
317 though diverse expression patterns were observed overall. In particular, the expression  
318 patterns of the EC types around the heart (HCoAEC, HAoEC and HPAEC) were similar  
319 (cluster 3 of DP and DEG), consistent with the anatomical proximity of these ECs.  
320 HENDCs had uniquely expressed genes (cluster 6 of DEGs). Considering that most of  
321 the DEGs and Des are cooperatively enriched in more than one EC type, these nine EC  
322 types may use distinct combinations of multiple genes, rather than exclusively  
323 expressed individual genes, for their specific phenotype.

324

### 325 **DEGs that contribute to EC functions**

326 Our clustering analysis also identified important genes for EC functions as  
327 DEGs (Figure 4B). For example, heart and neural crest derivatives expressed 2  
328 (*HAND2*) and GATA binding protein 4 (*GATA4*) were expressed in HAoECs, HENDCs  
329 and HPAECs (cluster 3). *HAND2* physically interacts with *GATA4* and the histone  
330 acetyltransferase p300 to form the enhanceosome complex, which regulates  
331 tissue-specific gene expression in the heart (25). Another example is hes related family

332 bHLH transcription factor with YRPW motif 2 (*HEY2*, also called *Hrt2*), a positive marker  
333 for arterial EC specification (26), which was grouped to cluster 5 and was expressed  
334 specifically in aorta-derived ECs but not in vein-derived ECs (HUVECs and HGSVECs).  
335 HRAECs showed uniquely upregulated genes, including cadherin 4 (*CDH4*); the protein  
336 product of this gene mediates cell-cell adhesion, and mutation of this gene is  
337 significantly associated with chronic kidney disease in the Japanese population (27).  
338 Interestingly, at TSSs of *CDH4* and *HEY2* loci, H3K4me3 was also enriched in some EC  
339 types in which the genes were not expressed, whereas the H3K27ac enrichment pattern  
340 at TSSs was correlated with the expression level (Figure 4C). This variation in  
341 H3K4me3 with/without H3K27ac enrichment may reflect the competence of expression,  
342 which cannot be fully captured by gene expression analysis.

343 DEGs also contained several notable gene families. One example is the  
344 claudin family, a group of transmembrane proteins involved in barrier and pore  
345 formation (28). Whereas *CLDN5* has been reported as a major constituent of the brain  
346 EC tight junctions that make up the blood-brain barrier (29), we found that seven other  
347 genes belonging to the claudin family (*CLDN1*, 7, 10, 11, 12, 14 and 15) were expressed  
348 in ECs, and their expression pattern varied across EC types (Supplementary Figure  
349 S11). For example, in HUVECs, *CLDN11* was highly expressed but *CLDN14* was not,  
350 although the two claudins share a similar function for cation permeability (30). These  
351 observations suggest that distinct usages of specific claudin proteins may result in  
352 different phenotypes with respect to vascular barrier function. Consequently, these  
353 DEGs are thus usable as a reference marker set for each EC type.

354

### 355 **Homeobox genes are highly differentially expressed across EC types**

356 We also found that DEGs identified in our analysis contained genes that were  
357 not previously acknowledged as relevant to the different EC types. Most strikingly, quite  
358 a few homeobox (*HOX*) genes were differentially expressed (cluster 1 in Figure 4B and  
359 Figure 5A). The human genome has four *HOX* clusters (*HOXA*, *B*, *C* and *D*), each of  
360 which contains 9–11 genes essential for determining the body axes during embryonic  
361 development, as well as regulating cell proliferation and migration in diverse organisms  
362 (31). These genes are transcribed sequentially in both time and space, following their

363 positions within each cluster (32). Figure 5A shows that genes in *HOX* clusters *A*, *B* and  
364 *D* were highly expressed in all EC types, except HENDCs, possibly because HENDCs  
365 are derived from cardiac neural crest, whereas the other EC types are derived from  
366 mesoderm (33). *HOXC* genes were moderately expressed in HRAECs, HUVECs and  
367 HUAECs, but not in the upper-body ECs. More interestingly, perhaps, *HOXD* genes  
368 were not expressed in HPAECs, despite their similar expression pattern relative to other  
369 EC types around the heart (Figure 4B). This result implies the distinct use of *HOX*  
370 paralogs, especially *HOXD* genes, in ECs. We also found that the 5' *HOX* genes (blue  
371 bars in Figure 5A) tended to be selectively expressed in EC types derived from the  
372 lower body (HGSVECs, HRAECs, HUAECs and HUVECs). Considering the collinearity  
373 of their activation during axial morphogenesis, it is conceivable that the type-specific  
374 expression of *HOX* clusters, especially in 5' *HOX* genes, reflects the developmental  
375 origin of EC types and that distinct activation of *HOX* genes collectively maintains the  
376 diversity of the circulatory system.

377 It has been suggested that the more 3' *HOX* genes tend to promote the  
378 angiogenic phenotype in ECs, whereas the more 5' *HOX* genes tend to be inhibitory  
379 with respect to that phenotype (31). For example, *HOXD3* may promote wound healing  
380 and invasive or migratory behavior during angiogenesis in ECs (34). In contrast,  
381 *HOXD10* may function to inhibit EC migration by muting the downstream effects of other  
382 pro-angiogenic *HOX* genes (e.g., *HOX3* paralogs), and thus human ECs that  
383 overexpress *HOXD10* fail to form new blood vessels (35). Figure 5A shows that  
384 *HOXD10* was highly expressed in HGSVECs, which evokes the inhibition of the  
385 angiogenic phenotype as regulated by *HOXD10* in this cell type.

386 In addition to *HOX* genes, multiple non-*HOX* homeobox genes were also  
387 differentially regulated across ECs. For example, cluster 3 in the DEGs contained NK2  
388 homeobox 5 (*Nkx-2.5*), which is essential for maintenance of ventricular identity (36);  
389 paired like homeodomain 2 (*PITX2*) and paired related homeobox 1 (*PRRX1*), which are  
390 both associated with the atrial fibrillation and cardioembolic ischemic stroke variants loci  
391 (37-39); and Meis homeobox 1 (*MEIS1*), which is required for heart development in  
392 mice (40). These were all associated with the GO term “blood vessel morphogenesis  
393 (GO:0048514)”. Interestingly, *PITX3* was mainly expressed in HENDCs (cluster 6),

394 unlike *PITX2*. Another example is Mesenchyme Homeobox 2 (*MEOX2*, also known as  
395 Gax; cluster 4), which regulates senescence and proliferation in HUVECs (41) and was  
396 also expressed in HUAECs and HGSVECs but not in other cell types. Taken together  
397 with the finding that some binding motifs of homeobox genes including *PITX* were  
398 identified among the EC-specific enhancer sites (Figure 3), these data suggest that  
399 distinct combinations of proteins coded by *HOX* and non-*HOX* homeobox genes play a  
400 key role in mature human ECs for angiogenesis, vasculogenesis and wound healing, in  
401 addition to their function during the development and proliferation of ECs.

402

#### 403 **Enhancers in the telomeric domain were upregulated within the *HOXD* cluster**

404       Lastly, we investigated the epigenomic landscape around the *HOXD* cluster  
405 (Figure 5B). It has been reported that the mammalian *HOXD* cluster is located between  
406 two enhancer-rich topologically associating domains (TADs), the centromeric domain  
407 (C-DOM) and the telomeric domain (T-DOM), which are activated during limb and digit  
408 development, respectively (42). By using public Hi-C (genome-wide Chromosome  
409 Conformation Capture (3C)) data for HUVECs (43) to detect the T-DOM and C-DOM  
410 (bottom black bars), we observed the presence of EC enhancers in the T-DOM (Figure  
411 5B), as in early stages of limb development (42). Of note, two long non-coding RNAs,  
412 *LINC01117* (*Hotdog*) and *LINC01116* (*Twin of Hotdog*), which physically contact the  
413 expressed *HOXD* genes and are activated during cecum budding (44), had ChIA-PET  
414 loops and showed similar expression patterns with *HOXD* genes in ECs (Figure 5A and  
415 5B). In the T-DOM, some enhancers are likely to be activated in most EC types (Figure  
416 5B, black arrow), whereas others are active only in ECs from the lower body (blue  
417 arrow), suggesting a physical interaction between these enhancers and each *HOXD*  
418 gene in a constitutive and a cell type-specific manner, respectively. A detailed view of  
419 the genomic region from *HOXD1* to *HOXD11* (Figure 5C) shows that H3K4me3 and  
420 H3K27ac are specifically enriched within the *HOXD10* locus in HGSVECs, which is  
421 consistent with their gene expression pattern. Because the *HOXD10* locus did not have  
422 ChIA-PET loops in HUVECs, there might be HGSVEC-specific chromatin loops.

423

424

425 **DISCUSSION**

426           In this study, we analyzed the epigenomic status of the active histone  
427 modifications H3K4me3 and H3K27ac in 33 samples from nine different EC types by  
428 ChIP-seq, RNA-seq, ChIA-PET and Hi-C analyses. The integrative ChIP-seq analysis  
429 based on the samples from the human tissues of multiple donors is hampered by both  
430 individual variations and technical noise derived from tissue sample acquisition under  
431 various conditions (e.g., race, sex, age and the sample acquirement process),  
432 compared with the smaller difference among EC types. To overcome these issues, at  
433 least in part, we developed a robust procedure for comparative epigenome analysis,  
434 combined with chromatin interaction data. We successfully identified 3,765 EC-specific  
435 enhancer sites, 67 of which were highly significantly overlapping with GWAS SNPs. We  
436 aim to expand this analysis to other core histone marks including suppressive markers  
437 (e.g., H3K27me3 and H3K9me3) and apply semi-automated genome annotation  
438 methods (45). Because this type of genome annotation strategy with its associated  
439 assembling of broad marks is more sensitive to noise, more stringent quality control of  
440 tissue data will be required.

441           The PCA showed that EC types can be divided into those from the upper and  
442 from the lower body (Figure 4A). The nine EC types tend to use distinct combinations of  
443 multiple genes, rather than exclusively expressed genes, for their specific phenotype  
444 (Figure 4B and Figure 5A). Our results identified key marker genes that were  
445 differentially expressed across EC types, such as homeobox genes. The importance of  
446 several *HOX* genes for early vascular development and adult angiogenesis in  
447 pathological conditions has been reported (46). However, a systematic analysis of the  
448 regulation and roles of homeobox genes in mature tissue cells has been lacking. We  
449 identified a regulatory motif enriched in EC-specific enhancers that is very similar to  
450 those of *homeobox* genes and distinct epigenome states and chromatin conformations  
451 of *HOX* gene clusters and flanking regions in different EC types. Taken together, our  
452 data suggest the distinct roles and combinatorial usage of *HOX* genes during  
453 development and in regulating EC phenotypes throughout the body.

454

455

456 **CONCLUSION**

457           The primary goal of the IHEC project is to generate high-quality reference  
458 epigenomes and make them available to the scientific community (10). To this end, we  
459 established an epigenetic catalog of various human ECs and implemented  
460 comprehensive analysis to elucidate the diversity of the epigenomic and transcriptomic  
461 landscape across EC types. The dataset presented in this study will be an important  
462 resource for future work on understanding the human cardiovascular system and its  
463 associated diseases.

464

465 **METHODS**

466 **Tissue preparation**

467           ECs were isolated from the vasculature and maintained as primary cultures, as  
468 reported (47, 48). Briefly, HAoECs, HCoAECs, HENDCs, HPAECs and HUVECs were  
469 isolated from the various vessels by incubating the vessels with collagenase at 37°C for  
470 30 minutes. The aortic root was used for HAoEC isolation. Cells were plated in tissue  
471 culture-treated flasks (Iwaki Glass Co. Ltd., cat. No.) and cultured for one or more  
472 passages in modified Vasculife VEGF Endothelial Medium (Lifeline Cell Technology). A  
473 reduced concentration of VEGF that was lower than 5 ng/mL was tested in preliminary  
474 cell culture experiments and then optimized to be as low as possible considering cell  
475 growth and viability (data not shown). The VEGF concentration was lowered to 250  
476 pg/mL, which is lower than the standard culture conditions, to more closely replicate in  
477 vivo concentrations (49). ECs were separated from non-ECs using immunomagnetic  
478 beads. Fibroblasts were first removed using anti-fibroblast beads and the appropriate  
479 magnetic column (Miltenyi Biotec). The remaining cells were then purified using  
480 Dynabeads and anti-CD31 (BAM3567, R&D Systems). When positive selection was  
481 used, the bead-bound cells were removed from the cell suspension prior to  
482 cryopreservation.

483           HCCaECs and HRECs were prepared by an explant culture method (48).  
484 HGSVECs were isolated from discarded veins taken from patients at Saitama Medical  
485 University International Medical Center.

486           Quality control was performed using a sterility test (for bacteria, yeast and



487 fungi), a PCR-based sterility test (for hepatitis B and C, HIV-I and -II and mycoplasma)  
488 and immunostaining-based characterization for von Willebrand factor (vWF) (>95%  
489 cells are positively stained (50)) and alpha-actin, and viability was determined by both  
490 counting and trypan blue staining.

491

#### 492 **Cell culture**

493 Purified ECs were cultured in Vasculife VEGF Endothelial Medium (Lifeline  
494 Cell Technology) with 250 pg/mL VEGF. Cells were maintained at 37°C in a humidified  
495 5% CO<sub>2</sub> incubator, and the medium was changed every 3 days. The cells used in the  
496 experiments were from passage 6 or less. The cryopreservation solution used consisted  
497 of Vasculife VEGF Endothelial medium, containing 250 pg/mL VEGF, 12% Fetal Bovine  
498 Serum (FBS) and 10% Dimethylsulfoxide (DMSO).

499

#### 500 **RNA-seq analysis**

501 Poly(A)-containing mRNA molecules were isolated from total RNA and then  
502 converted to cDNA with oligo(dT) primers using a TruSeq RNA Sample Preparation kit  
503 v2 (Illumina) and were sequenced with a HiSeq 2500 system (Illumina). We applied  
504 sequenced paired-end reads to kallisto version 0.43.1 (51) with the "--rf-stranded -b 100"  
505 option, which estimates the transcript-level expression values as Transcripts Per  
506 Kilobase Million (TPM, Ensembl gene annotation GRCh37). These transcript-level  
507 expression values were then assembled to the gene-level by tximport (52). We also  
508 obtained RNA-seq data from IMR90 cells from the Sequence Read Archive (SRA)  
509 ([www.ncbi.nlm.nih.gov/sra](http://www.ncbi.nlm.nih.gov/sra)) under accession number SRR2952390. The full list of gene  
510 expression data is available at the NCBI Gene Expression Omnibus (GEO) under the  
511 accession number GSE131953.

512

#### 513 **ChIP**

514 For each EC sample, two million ECs were plated on a 15-cm culture plate and  
515 cultured until confluency. The cells were crosslinked for 10 minutes using 1%  
516 paraformaldehyde. After quenching using 0.2 M glycine, cells were collected using a  
517 scraper, resuspended in SDS lysis buffer (10 mM Tris-HCl, 150 mM NaCl, 1% SDS, 1

518 mM EDTA; pH 8.0) and fragmented by sonication (Branson, Danbury, CT, USA; 10  
519 minutes). Samples were stored at  $-80^{\circ}\text{C}$  before use. To perform ChIP, antibodies  
520 against histone modifications (CMA304 and CMA309 for H3K4me3 and H3K27ac,  
521 respectively) (53) were used in combination with protein G Sepharose beads (GE  
522 Healthcare Bio-Sciences AB, Sweden). The prepared DNA was quantified using Qubit  
523 (Life Technologies/Thermo Fisher Scientific), and  $>10$  ng of DNA was processed, as  
524 described below. The primer sequences for ChIP-qPCR were as follows: for H3K4me3,  
525 KDR (Fw: CCACAGACTCGCTGGGTAAT, Rv: GAGCTGGAGAGTTGGACAGG) and  
526 GAPDH (Fw: CGCTCACTGTTCTCTCCCTC, Rv: GACTCCGACCTTCACCTT CC); for  
527 H3K27ac, ANGPTL4 (Fw: TAGGGGAATGGGTAGGGAAG, Rv:  
528 AGTTCTCAGGCAGGTGGAGA) and GATA2 (Fw: AGACGACCCCAACTGACATC, Rv:  
529 CCTTCAAATGCAGACGCTTT) and, as a negative control, HBB (Fw:  
530 GGGCTGAGGGTTTGAAGTCC, Rv: CATGGTGTCTGTTTGAGGTTGC).

531

### 532 **ChIP-seq analysis**

533 Sequencing libraries were made using the NEBNext ChIP-Seq Library Prep  
534 Master Mix Set of Illumina (New England Biolabs). Sequenced reads were mapped to  
535 the human genome using Bowtie version 1.2 (54) allowing two mismatches in the first  
536 28 bases per read and outputting only uniquely mapped reads (-n2 -m1 option). Peaks  
537 were called by DROMPA version 3.5.1 (55) using the stringent parameter set (-sm 200  
538 -pthre\_internal 0.00001 -pthre\_enrich 0.00001) to mitigate the effect of technical noise.  
539 The mapping and peak statistics are summarized in Supplementary Table S2.

540

### 541 **Quality validation of ChIP-seq samples**

542 We checked the quality of each sample based on the peak number, library  
543 complexity and GC content bias by DROMPA; the normalized strand coefficient and  
544 background uniformity by SSP (12); inter-sample correlation (jaccard index of peak  
545 overlap) by bedtools (<https://github.com/arq5x/bedtools2>); and the pairwise correlations  
546 of read coverage by deepTools version 2.5.0 (56) (Supplementary Figure S1).

547

548

549 **Regression analysis of ChIP-seq data**

550 To estimate the expression level of a gene from the level of its histone  
551 modifications, we implemented the linear regression analysis proposed by Karlic *et al.*  
552 (13) with minor modifications. We built a two-variable model to predict the expression  
553 level for each mRNA as follows:

$$f(x_1, x_2) = a + b_1x_1 + b_2x_2$$

554 where  $x_1$  and  $x_2$  are the log-scale basepair coverage in a region of 4-kbp surrounding  
555 the TSSs covered by obtained peaks of H3K4me3 and H3K27ac, respectively. We used  
556 the level of protein-coding mRNA in autosomes as an estimation of the level of histone  
557 modifications. We then learned the parameters  $a$ ,  $b_1$  and  $b_2$  using all of the EC samples  
558 and the IMR90 sample to minimize the differences between observed and expected  
559 values. Using the learned parameter set, we predicted the expression value for each  
560 mRNA and calculated the Pearson correlation between observed and expected values.

561

562 **Definition of reference promoter and enhancer sites**

563 As shown in Figure 1B, we defined active promoters and enhancers as  
564 “H3K4me3 sites overlapping with H3K27ac sites by  $\geq 1$  bp” and “H3K27ac sites not  
565 overlapping with H3K4me3 sites”, respectively, based on the annotation of the  
566 Roadmap Epigenomics consortium (14). Peaks from sex chromosomes were excluded  
567 to ignore sex-specific difference. To avoid the effect of individual differences, the  
568 common sites among all samples were used as the reference sites for each cell type.  
569 Then the reference sites of all cell types were merged into the reference sites of ECs.  
570 Multiple sites that were within 100 bp of each other were merged to avoid multiple  
571 counts of large individual sites. The generated reference promoter and enhancer sites  
572 are available at the GEO under the accession number GSE131953.

573

574 **Identification of EC-specific sites**

575 We called peaks for H3K4me3 and H3K27ac for all 117 cell lines in the  
576 Roadmap Epigenomics Project by DROMPA with the same parameter set and excluded  
577 the sites in the reference promoter and enhancer sites of ECs that overlapped the  
578 H3K4me3 peaks (promoter sites) or H3K27ac peaks (enhancer sites) of all cells except

579 for E122 (HUVECs) from the Roadmap Epigenomics Project. Similarly, we further  
580 excluded the sites that overlapped H3K27ac peaks of IMR90 cells generated by this  
581 study, to avoid the protocol-dependent false-positive peaks. The resulting sites were  
582 used as EC-specific sites. We also defined “distal enhancer sites” as those that are >10  
583 kbp from the nearest TSS. These sites are summarized in Table S2.

584

#### 585 **GWAS enrichment analysis**

586 We implemented GWAS enrichment analysis using a strategy similar to that of  
587 Lake *et al.* (19). We obtained reference SNPs from the GWAS Catalog [18]. We then  
588 calculated the occurrence probability of GWAS SNPs associated with the terms “heart”,  
589 “coronary” and “cardiac” in 100-kb regions centered on all EC-specific enhancer sites  
590 and investigated their statistical significance by random permutations. We extended  
591 each enhancer site to a 100-kb region to consider linkage disequilibrium with GWAS  
592 SNPs. We identified the enhancer sites with a Z-score > 5.0. We shuffled the enhancer  
593 sites randomly within each chromosome, ignoring the centromeric region, using  
594 bedtools shuffle command.

595

#### 596 **Differential analysis of multiple groups for histone modification and gene 597 expression**

598 We applied the ANOVA-like test in edgeR (57) based on the normalized read  
599 counts of H3K4me3 ChIP-seq data in active promoters and H3K27ac ChIP-seq data in  
600 active promoters and enhancers, as well as gene expression data, while fitting the  
601 values among samples to estimate dispersion using generalized linear models. For  
602 RNA-seq data, the count data were fitted using a generalized linear model, and the  
603 Z-score was calculated based on logged values. For ChIP-seq data, we also applied the  
604 quantile normalization to peak intensity in advance of the fitting because this model  
605 does not consider the different S/N ratios among samples (58). This normalization  
606 assumes that the S/N ratio for most of the common peaks should be the same among  
607 all samples in which the same antibody was used. Supplementary Figure S12 shows  
608 the distribution patterns of the H3K27ac read density normalized for quantile  
609 normalization for all ECs.

## 610 **Chromatin interaction analysis**

611 We used ChIA-PET data mediated by RNA Pol II for HUVECs (59). We  
612 acquired fastq files from the GEO under accession number GSE41553, applied Mango  
613 (60) with default parameter settings and identified the 943 significant interactions (1,886  
614 sites, FDR < 0.05). For Hi-C analysis, we acquired .hic files for HUVECs from the GEO  
615 under accession number GSE63525 and applied Juicer (43) to obtained the TAD  
616 structure (Figure 5B).

617

## 618 **Motif analysis**

619 We used MEME-ChIP version 5.0.1 (61) with the parameter set “-meme-mod  
620 zoops -meme-minw 6 -meme-maxw 14” with the motif data  
621 “JASPAR2018\_CORE\_non-redundant.meme”.

622

## 623 **List of abbreviations**

624 EC: Endothelial cells; S/N: signal-to-noise ratio; PCA: principal component  
625 analysis; Pol II: RNA Polymerase II; FDR: false discovery rate; GWAS: Genome-wide  
626 association study; SNP: single-nucleotide polymorphism; GO: Gene Ontology; DP:  
627 differential promoter; DE: differential enhancer; DEG: differentially expressed gene;  
628 TAD: topologically associating domain; C-DOM: the centromeric domain; T-DOM: the  
629 telomeric domain; vWF: von Willebrand factor; TPM: Transcripts Per Kilobase Million

630

## 631 **Declarations**

### 632 ***Ethics approval and consent to participate***

633 Human clinical specimens were prepared from discarded tissue during surgery  
634 under consent of donors at Saitama Medical University International Medical Center  
635 according to the Institutional Review Board (IRB) protocol 15-209, at Ohta Memorial  
636 Hospital according to the IRB protocols 068 and 069 and at The University of Tokyo  
637 according to the IRB protocol G3577. Primary ECs were isolated at The University of  
638 Tokyo according to the IRB protocol 17-311. Other ECs were prepared from a  
639 commercial biobank (Lifeline Cell Technology, Frederick, MD). DNA and RNA samples  
640 were prepared at The University of Tokyo according to the IRB protocol 12-81.

641 ***Consent for publication***

642 As to purchased cells, not applicable. As to primary cultivated cells from human  
643 tissue, written informed consent was obtained from the patients for publication of their  
644 individual details and accompanying images in this manuscript. The consent form is  
645 held by the authors and is available for review by the Editor-in-Chief.

646

647 ***Availability of data and materials***

648 The raw sequencing data and processed files are available at the GEO under  
649 the accession numbers GSE131953 (ChIP-seq) and GSE131681 (RNA-seq) with links  
650 to BioProject accession number PRJNA532996. The data summary, quality control  
651 results, the full list of ChIA-PET loops and visualization figures are available on the EC  
652 analysis website (<https://rnakato.github.io/HumanEndothelialEpigenome/>).

653

654 ***Competing interests***

655 The authors declare no competing interests.

656

657 ***Funding***

658 This work was supported by a grant from the Japan Agency for Medical  
659 Research and Development (AMED-CREST, Grant ID JP16gm0510005h0006), the  
660 Basis for Supporting Innovative Drug Discovery and Life Science Research from AMED  
661 (to H.K. and K.S.) and a grant-in-aid for Scientific Research (17H06331 to R.N. and  
662 JP18H05527 to H.K.).

663

664 ***Authors' contributions***

665 R. Nakato designed the studies, performed bioinformatics analysis and drafted  
666 the manuscript. Y.W. designed the studies, carried out the molecular genetic studies and  
667 drafted the manuscript. R. Nakaki, N.N., S.T., T. Kohro, N.O., Y.S. and T.M. performed  
668 bioinformatics analyses. G.N. and K.T. performed mRNA-seq. Y. Katou performed library  
669 preparation and sequencing. Y. Kanki performed cell culture, prepared samples and  
670 drafted the manuscript. M.K. and A.K. performed cell culture and prepared samples.  
671 Y.H-T. and A.I-T. prepared reagents and performed chromatin immunoprecipitation. H.F.,

672 A.I., H.N., M.N., T.S., S.N. H.W., S.O., M.A., R.C.M., K.W.H., T. Kawakatsu, M.G., H.Y., H.  
673 Kume, and Y.H. prepared primary cell cultures. H.A. and K.S. designed the studies and  
674 drafted the manuscript. H.Kimura prepared antibodies, designed the studies and drafted  
675 the manuscript.

676

### 677 **Acknowledgements**

678 Advanced Medical Graphics (MA, USA) prepared the graphics of the organs  
679 and tissues. Niinami Hiroshi continuously supported domestic sample collection and  
680 preparation. We thank Ryozo Omoto for providing the pipeline from the surgical  
681 operating room to the research laboratory.

682

### 683 **Competing Interests**

684 The authors declare no competing interests.

685

### 686 **References**

- 687 1. Aird WC. Phenotypic heterogeneity of the endothelium: II. Representative  
688 vascular beds. *Circulation research*. 2007;100(2):174-90.
- 689 2. Thompson RC, Allam AH, Lombardi GP, Wann LS, Sutherland ML, Sutherland  
690 JD, et al. Atherosclerosis across 4000 years of human history: the Horus study of four  
691 ancient populations. *Lancet*. 2013;381(9873):1211-22.
- 692 3. Eppihimer MJ, Wolitzky B, Anderson DC, Labow MA, Granger DN.  
693 Heterogeneity of expression of E- and P-selectins in vivo. *Circulation research*.  
694 1996;79(3):560-9.
- 695 4. Kaufer E, Factor SM, Frame R, Brodman RF. Pathology of the radial and  
696 internal thoracic arteries used as coronary artery bypass grafts. *The Annals of thoracic*  
697 *surgery*. 1997;63(4):1118-22.
- 698 5. Aird WC. Phenotypic heterogeneity of the endothelium: I. Structure, function,  
699 and mechanisms. *Circulation research*. 2007;100(2):158-73.
- 700 6. Sabik JF, 3rd, Raza S, Blackstone EH, Houghtaling PL, Lytle BW. Value of  
701 internal thoracic artery grafting to the left anterior descending coronary artery at  
702 coronary reoperation. *Journal of the American College of Cardiology*.  
703 2013;61(3):302-10.
- 704 7. Chi JT, Chang HY, Haraldsen G, Jahnsen FL, Troyanskaya OG, Chang DS, et  
705 al. Endothelial cell diversity revealed by global expression profiling. *Proceedings of the*

- 706 National Academy of Sciences of the United States of America. 2003;100(19):10623-8.  
707 8. Kanki Y, Kohro T, Jiang S, Tsutsumi S, Mimura I, Suehiro J, et al. Epigenetically  
708 coordinated GATA2 binding is necessary for endothelium-specific endomucin  
709 expression. *The EMBO journal*. 2011;30(13):2582-95.
- 710 9. Tozawa H, Kanki Y, Suehiro J, Tsutsumi S, Kohro T, Wada Y, et al.  
711 Genome-wide approaches reveal functional interleukin-4-inducible STAT6 binding to the  
712 vascular cell adhesion molecule 1 promoter. *Mol Cell Biol*. 2011;31(11):2196-209.
- 713 10. Stunnenberg HG, International Human Epigenome C, Hirst M. The  
714 International Human Epigenome Consortium: A Blueprint for Scientific Collaboration  
715 and Discovery. *Cell*. 2016;167(5):1145-9.
- 716 11. Ernst J, Kheradpour P, Mikkelsen TS, Shores N, Ward LD, Epstein CB, et al.  
717 Mapping and analysis of chromatin state dynamics in nine human cell types. *Nature*.  
718 2011;473(7345):43-9.
- 719 12. Nakato R, Shirahige K. Sensitive and robust assessment of ChIP-seq read  
720 distribution using a strand-shift profile. *Bioinformatics*. 2018;34(14):2356-63.
- 721 13. Karlic R, Chung HR, Lasserre J, Vlahovicek K, Vingron M. Histone modification  
722 levels are predictive for gene expression. *Proceedings of the National Academy of  
723 Sciences of the United States of America*. 2010;107(7):2926-31.
- 724 14. Roadmap Epigenomics Consortium, Kundaje A, Meuleman W, Ernst J, Bilenky  
725 M, Yen A, et al. Integrative analysis of 111 reference human epigenomes. *Nature*.  
726 2015;518(7539):317-30.
- 727 15. Allahyar A, Vermeulen C, Bouwman BAM, Krijger PHL, Verstegen M, Geeven  
728 G, et al. Enhancer hubs and loop collisions identified from single-allele topologies.  
729 *Nature genetics*. 2018;50(8):1151-60.
- 730 16. Waltenberger J, Claesson-Welsh L, Siegbahn A, Shibuya M, Heldin CH.  
731 Different signal transduction properties of KDR and Flt1, two receptors for vascular  
732 endothelial growth factor. *The Journal of biological chemistry*. 1994;269(43):26988-95.
- 733 17. Lyck R, Enzmann G. The physiological roles of ICAM-1 and ICAM-2 in  
734 neutrophil migration into tissues. *Current opinion in hematology*. 2015;22(1):53-9.
- 735 18. Buniello A, MacArthur JAL, Cerezo M, Harris LW, Hayhurst J, Malangone C, et  
736 al. The NHGRI-EBI GWAS Catalog of published genome-wide association studies,  
737 targeted arrays and summary statistics 2019. *Nucleic Acids Res*.  
738 2019;47(D1):D1005-D12.
- 739 19. Lake BB, Chen S, Sos BC, Fan J, Kaeser GE, Yung YC, et al. Integrative  
740 single-cell analysis of transcriptional and epigenetic states in the human adult brain.  
741 *Nature biotechnology*. 2018;36(1):70-80.



- 742 20. van der Harst P, Verweij N. Identification of 64 Novel Genetic Loci Provides an  
743 Expanded View on the Genetic Architecture of Coronary Artery Disease. *Circulation*  
744 *research*. 2018;122(3):433-43.
- 745 21. Coronary Artery Disease Genetics C. A genome-wide association study in  
746 Europeans and South Asians identifies five new loci for coronary artery disease. *Nature*  
747 *genetics*. 2011;43(4):339-44.
- 748 22. Kichaev G, Bhatia G, Loh PR, Gazal S, Burch K, Freund MK, et al. Leveraging  
749 Polygenic Functional Enrichment to Improve GWAS Power. *Am J Hum Genet*.  
750 2019;104(1):65-75.
- 751 23. Ehret GB, Ferreira T, Chasman DI, Jackson AU, Schmidt EM, Johnson T, et al.  
752 The genetics of blood pressure regulation and its target organs from association studies  
753 in 342,415 individuals. *Nat Genet*. 2016;48(10):1171-84.
- 754 24. McLean CY, Bristor D, Hiller M, Clarke SL, Schaar BT, Lowe CB, et al. GREAT  
755 improves functional interpretation of cis-regulatory regions. *Nature biotechnology*.  
756 2010;28(5):495-501.
- 757 25. Dai YS, Cserjesi P, Markham BE, Molkenin JD. The transcription factors  
758 GATA4 and dHAND physically interact to synergistically activate cardiac gene  
759 expression through a p300-dependent mechanism. *The Journal of biological chemistry*.  
760 2002;277(27):24390-8.
- 761 26. Aranguren XL, Agirre X, Beerens M, Coppiello G, Uriz M, Vandersmissen I, et  
762 al. Unraveling a novel transcription factor code determining the human arterial-specific  
763 endothelial cell signature. *Blood*. 2013;122(24):3982-92.
- 764 27. Yoshida T, Kato K, Yokoi K, Oguri M, Watanabe S, Metoki N, et al. Association  
765 of genetic variants with chronic kidney disease in Japanese individuals with or without  
766 hypertension or diabetes mellitus. *Exp Ther Med*. 2010;1(1):137-45.
- 767 28. Morita K, Furuse M, Fujimoto K, Tsukita S. Claudin multigene family encoding  
768 four-transmembrane domain protein components of tight junction strands. *Proc Natl*  
769 *Acad Sci U S A*. 1999;96(2):511-6.
- 770 29. Morita K, Sasaki H, Furuse M, Tsukita S. Endothelial claudin: claudin-5/TMVCF  
771 constitutes tight junction strands in endothelial cells. *The Journal of cell biology*.  
772 1999;147(1):185-94.
- 773 30. Amasheh S, Fromm M, Gunzel D. Claudins of intestine and nephron - a  
774 correlation of molecular tight junction structure and barrier function. *Acta physiologica*.  
775 2011;201(1):133-40.
- 776 31. Gorski DH, Walsh K. Control of vascular cell differentiation by homeobox  
777 transcription factors. *Trends in cardiovascular medicine*. 2003;13(6):213-20.

- 778 32. Kmita M, Duboule D. Organizing axes in time and space; 25 years of colinear  
779 tinkering. *Science*. 2003;301(5631):331-3.
- 780 33. Srivastava D. Making or breaking the heart: from lineage determination to  
781 morphogenesis. *Cell*. 2006;126(6):1037-48.
- 782 34. Uyeno LA, Newman-Keagle JA, Cheung I, Hunt TK, Young DM, Boudreau N.  
783 Hox D3 expression in normal and impaired wound healing. *The Journal of surgical*  
784 *research*. 2001;100(1):46-56.
- 785 35. Myers C, Charboneau A, Cheung I, Hanks D, Boudreau N. Sustained  
786 expression of homeobox D10 inhibits angiogenesis. *The American journal of pathology*.  
787 2002;161(6):2099-109.
- 788 36. Targoff KL, Colombo S, George V, Schell T, Kim SH, Solnica-Krezel L, et al.  
789 Nkx genes are essential for maintenance of ventricular identity. *Development*.  
790 2013;140(20):4203-13.
- 791 37. Christophersen IE, Rienstra M, Roselli C, Yin X, Geelhoed B, Barnard J, et al.  
792 Large-scale analyses of common and rare variants identify 12 new loci associated with  
793 atrial fibrillation. *Nature genetics*. 2017;49(6):946-52.
- 794 38. Gudbjartsson DF, Arnar DO, Helgadottir A, Gretarsdottir S, Holm H, Sigurdsson  
795 A, et al. Variants conferring risk of atrial fibrillation on chromosome 4q25. *Nature*.  
796 2007;448(7151):353-7.
- 797 39. Neurology Working Group of the Cohorts for H, Aging Research in Genomic  
798 Epidemiology Consortium tSGN, the International Stroke Genetics C. Identification of  
799 additional risk loci for stroke and small vessel disease: a meta-analysis of genome-wide  
800 association studies. *The Lancet Neurology*. 2016;15(7):695-707.
- 801 40. Wang H, Liu C, Liu X, Wang M, Wu D, Gao J, et al. MEIS1 Regulates  
802 Hemogenic Endothelial Generation, Megakaryopoiesis, and Thrombopoiesis in Human  
803 Pluripotent Stem Cells by Targeting TAL1 and FLI1. *Stem Cell Reports*.  
804 2018;10(2):447-60.
- 805 41. Gohn CR, Blue EK, Sheehan BM, Varberg KM, Haneline LS. Mesenchyme  
806 Homeobox 2 Enhances Migration of Endothelial Colony Forming Cells Exposed to  
807 Intrauterine Diabetes Mellitus. *Journal of cellular physiology*. 2017;232(7):1885-92.
- 808 42. Andrey G, Montavon T, Mascrez B, Gonzalez F, Noordermeer D, Leleu M, et al.  
809 A switch between topological domains underlies HoxD genes collinearity in mouse limbs.  
810 *Science*. 2013;340(6137):1234167.
- 811 43. Rao SS, Huntley MH, Durand NC, Stamenova EK, Bochkov ID, Robinson JT, et  
812 al. A 3D map of the human genome at kilobase resolution reveals principles of  
813 chromatin looping. *Cell*. 2014;159(7):1665-80.

- 814 44. Delpretti S, Montavon T, Leleu M, Joye E, Tzika A, Milinkovitch M, et al.  
815 Multiple enhancers regulate Hoxd genes and the Hotdog LncRNA during cecum  
816 budding. *Cell reports*. 2013;5(1):137-50.
- 817 45. Hoffman MM, Buske OJ, Wang J, Weng Z, Bilmes JA, Noble WS.  
818 Unsupervised pattern discovery in human chromatin structure through genomic  
819 segmentation. *Nature methods*. 2012;9(5):473-6.
- 820 46. Kachgal S, Mace KA, Boudreau NJ. The dual roles of homeobox genes in  
821 vascularization and wound healing. *Cell adhesion & migration*. 2012;6(6):457-70.
- 822 47. Wada Y, Sugiyama A, Yamamoto T, Naito M, Noguchi N, Yokoyama S, et al.  
823 Lipid accumulation in smooth muscle cells under LDL loading is independent of LDL  
824 receptor pathway and enhanced by hypoxic conditions. *Arteriosclerosis, thrombosis,  
825 and vascular biology*. 2002;22(10):1712-9.
- 826 48. Kobayashi M, Inoue K, Warabi E, Minami T, Kodama T. A simple method of  
827 isolating mouse aortic endothelial cells. *Journal of atherosclerosis and thrombosis*.  
828 2005;12(3):138-42.
- 829 49. Vermeulen PB, Salven P, Benoy I, Gasparini G, Dirix LY. Blood platelets and  
830 serum VEGF in cancer patients. *Br J Cancer*. 1999;79(2):370-3.
- 831 50. Au-Yeung KK, Woo CW, Sung FL, Yip JC, Siow YL, O K.  
832 Hyperhomocysteinemia activates nuclear factor-kappaB in endothelial cells via  
833 oxidative stress. *Circ Res*. 2004;94(1):28-36.
- 834 51. Bray NL, Pimentel H, Melsted P, Pachter L. Near-optimal probabilistic RNA-seq  
835 quantification. *Nature biotechnology*. 2016;34(5):525-7.
- 836 52. Sonesson C, Love MI, Robinson MD. Differential analyses for RNA-seq:  
837 transcript-level estimates improve gene-level inferences. *F1000Research*. 2015;4:1521.
- 838 53. Kimura H, Hayashi-Takanaka Y, Goto Y, Takizawa N, Nozaki N. The  
839 organization of histone H3 modifications as revealed by a panel of specific monoclonal  
840 antibodies. *Cell structure and function*. 2008;33(1):61-73.
- 841 54. Langmead B, Trapnell C, Pop M, Salzberg SL. Ultrafast and memory-efficient  
842 alignment of short DNA sequences to the human genome. *Genome biology*.  
843 2009;10(3):R25.
- 844 55. Nakato R, Itoh T, Shirahige K. DROMPA: easy-to-handle peak calling and  
845 visualization software for the computational analysis and validation of ChIP-seq data.  
846 *Genes to cells : devoted to molecular & cellular mechanisms*. 2013;18(7):589-601.
- 847 56. Ramirez F, Ryan DP, Gruning B, Bhardwaj V, Kilpert F, Richter AS, et al.  
848 deepTools2: a next generation web server for deep-sequencing data analysis. *Nucleic  
849 acids research*. 2016;44(W1):W160-5.

- 850 57. Zhou X, Lindsay H, Robinson MD. Robustly detecting differential expression in  
851 RNA sequencing data using observation weights. *Nucleic acids research*.  
852 2014;42(11):e91.
- 853 58. Nakato R, Shirahige K. Recent advances in ChIP-seq analysis: from quality  
854 management to whole-genome annotation. *Briefings in bioinformatics*.  
855 2017;18(2):279-90.
- 856 59. Papantonis A, Kohro T, Baboo S, Larkin JD, Deng B, Short P, et al. TNFalpha  
857 signals through specialized factories where responsive coding and miRNA genes are  
858 transcribed. *The EMBO journal*. 2012;31(23):4404-14.
- 859 60. Phanstiel DH, Boyle AP, Heidari N, Snyder MP. Mango: a bias-correcting  
860 ChIA-PET analysis pipeline. *Bioinformatics*. 2015;31(19):3092-8.
- 861 61. Machanick P, Bailey TL. MEME-ChIP: motif analysis of large DNA datasets.  
862 *Bioinformatics*. 2011;27(12):1696-7.
- 863 62. Zhou Y, Zhou B, Pache L, Chang M, Khodabakhshi AH, Tanaseichuk O, et al.  
864 Metascape provides a biologist-oriented resource for the analysis of systems-level  
865 datasets. *Nat Commun*. 2019;10(1):1523.
- 866
- 867

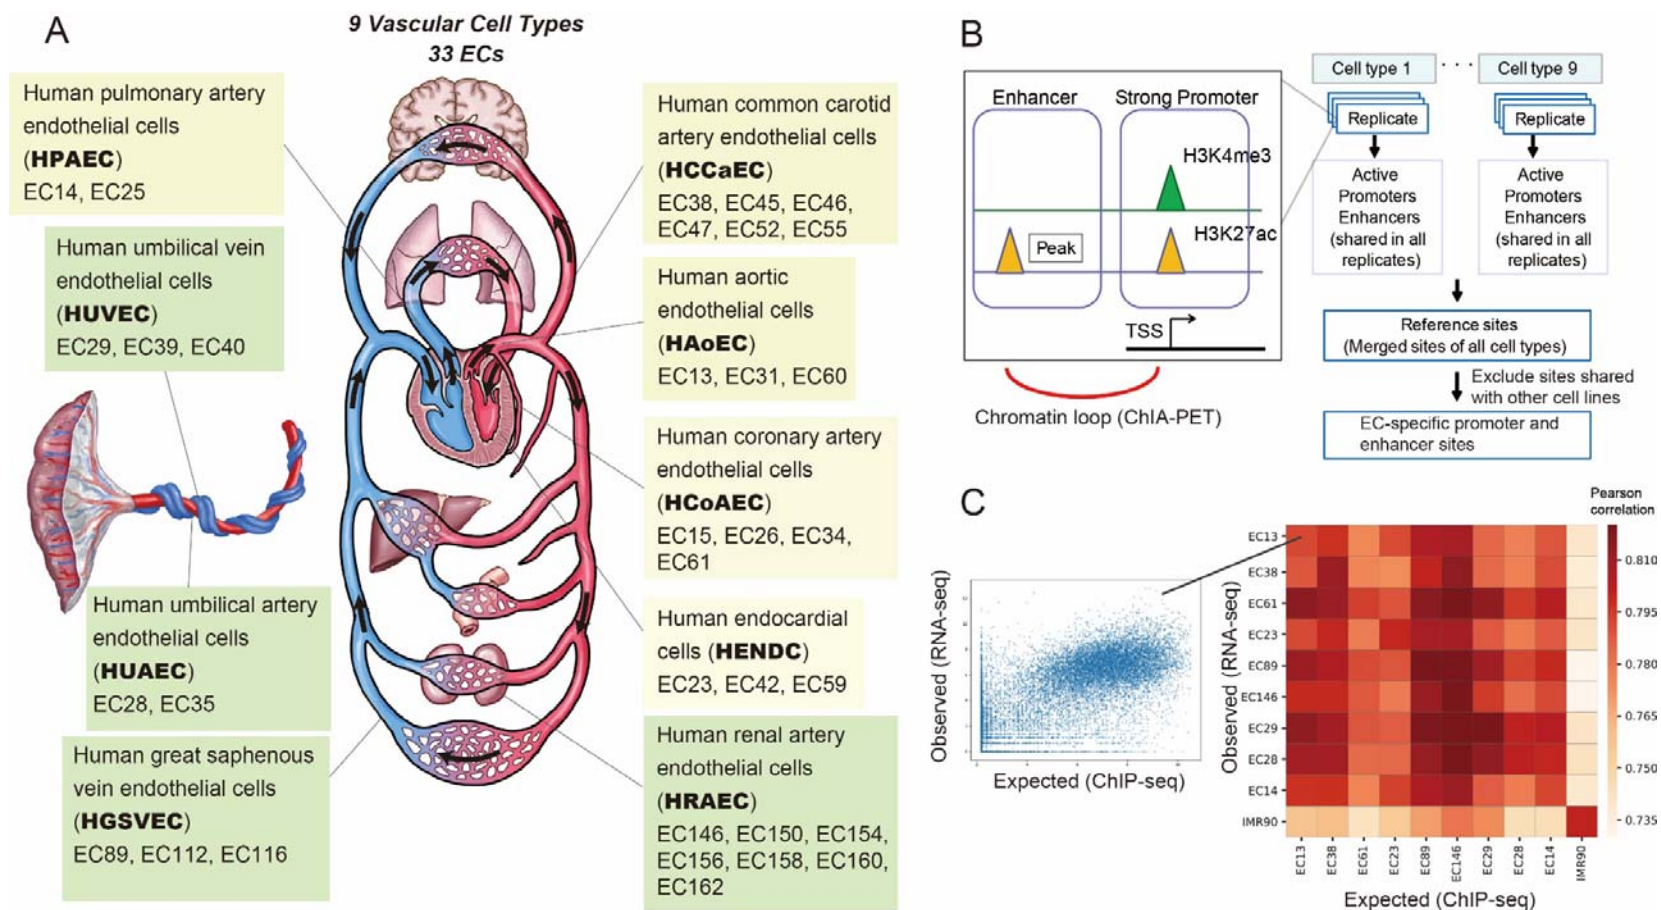

868

869

870 **Figure 1.** Summary of the cell types and histone modifications analyzed in this project. (A) Schematic illustration of the cardiovascular  
 871 system, nine EC types and 33 individual samples (prefixed EC\*) used in this paper. The yellow and green boxes indicate EC types

872 from upper body and lower body, respectively. (B) Workflow to identify the reference sites for ECs. The active promoter and enhancer  
873 sites of each sample were identified. For each cell type, the shared sites across all samples were extracted as the reference sites.  
874 These were integrated into a single set of reference sites for ECs, which was used for the downstream analyses. ChIA-PET data were  
875 utilized to identify the corresponding gene for the reference enhancer sites. (C) Correlation between observed and expected (from  
876 ChIP-seq analysis using linear regression model) gene expression data. Left: example scatterplot of observed and expected gene  
877 expression level for genes (data from EC13). Right: Pearson correlation heatmap for representative samples of nine cell types and  
878 IMR90 cells (as a negative control).  
879

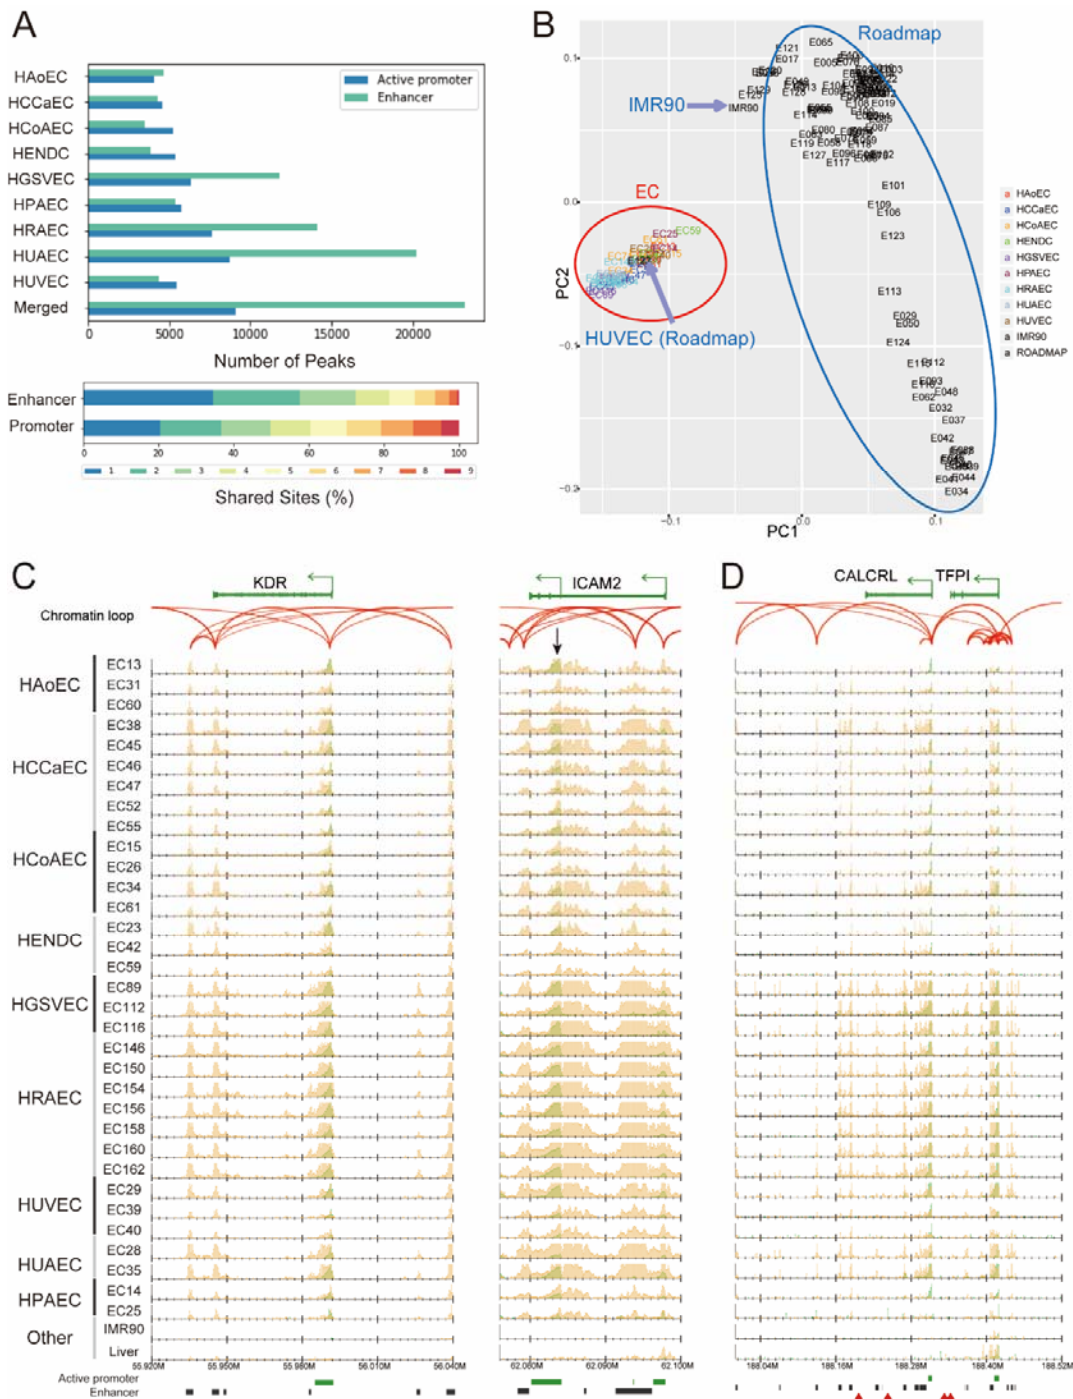

880

881

882 **Figure 2.** ChIP-seq data indicate variation in the chromatin status of ECs. (A) Top: The  
 883 number of active promoter and enhancer sites for the nine cell types along with the  
 884 merged reference sites. Bottom: The percentage of the reference active promoter and  
 885 enhancer sites shared by one to nine of the EC types. (B) PCA plot using H3K27ac read

886 densities. All EC samples in this paper (red circle) as well as 117 cell lines from  
887 Roadmap Epigenomics Project (blue circle) are shown. The label colors indicate the EC  
888 types. (C, D) Normalized read distribution of H3K4me3 (green) and H3K27ac (orange)  
889 in representative gene loci (C) *KDR* and *ICAM2* and (D) *CALCRL* and *TFPI* for all ECs  
890 and two other tissues (liver from the Roadmap and the IMR90 cells in this study).  
891 Chromatin loops based on ChIA-PET (read-pairs) are represented by red arches. Green  
892 bars, black bars and red triangles below each graph indicate active promoter sites,  
893 enhancer sites and GWAS SNPs, respectively.

894

895



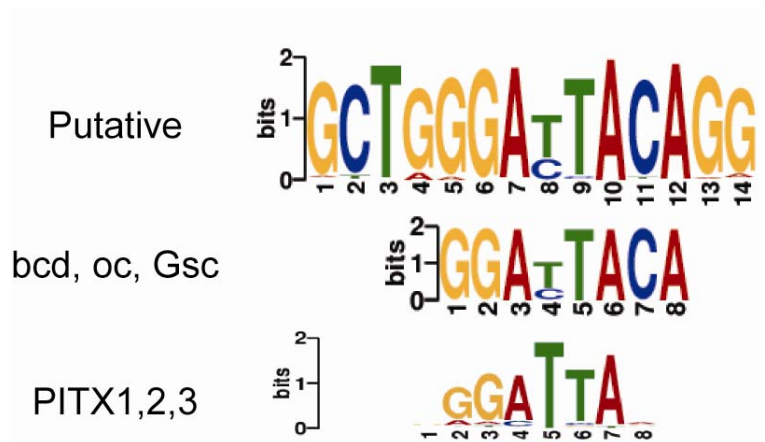

896

897 **Figure 3.** The identified *de novo* motif from EC-specific enhancer sites. The two related  
898 canonical motifs derived from JASPAR database are also shown.

899

900

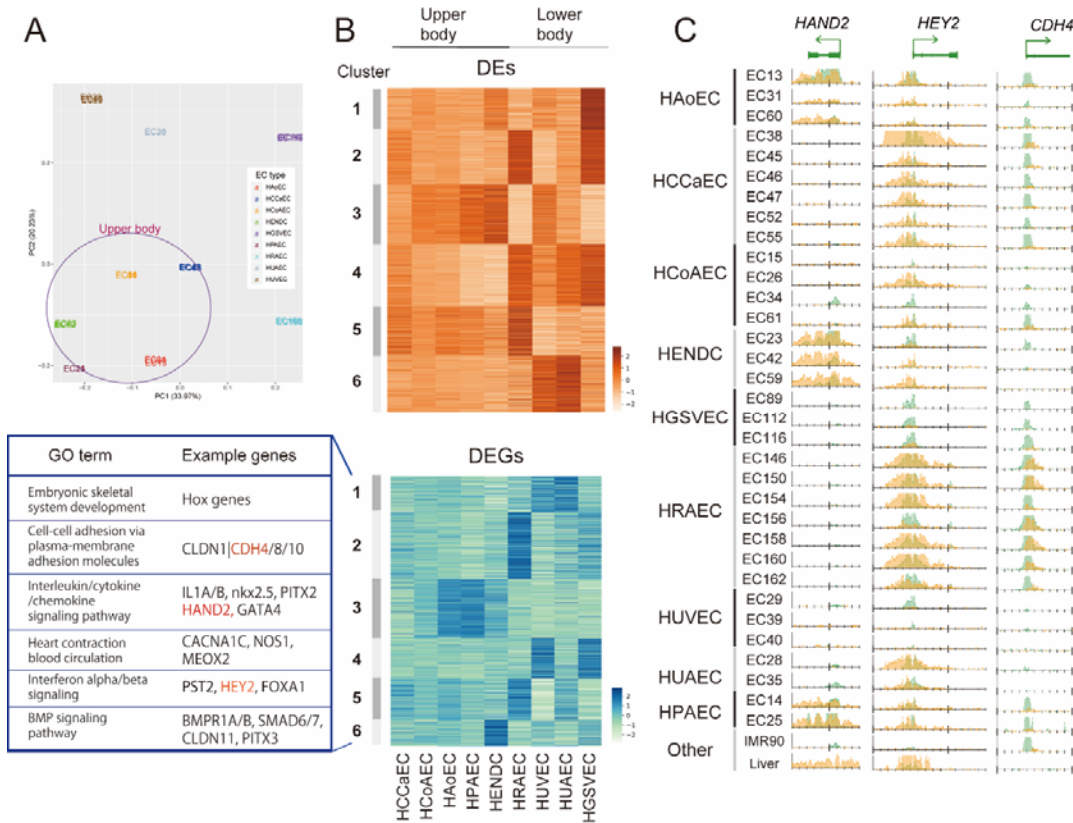

901

902 **Figure 4:** Comparative analysis of enhancer sites and gene expression across EC  
 903 types. (A) PCA plot of EC samples based on H3K27ac read density fitted by generalized  
 904 linear models. The color of samples indicates EC types. Samples from upper body are  
 905 circled. (B) A k-means clustering (k = 6) analysis of DEs (upper) and DEGs (lower)  
 906 across EC types (a representative for each type) based on Z-scores. The example  
 907 genes and related GO terms obtained by Metascape (62) for DEG clusters are also  
 908 shown. (C) Read distribution of H3K4me3 (green) and H3K27ac (orange) for the genes  
 909 highlighted in red in panel (B).

910

911

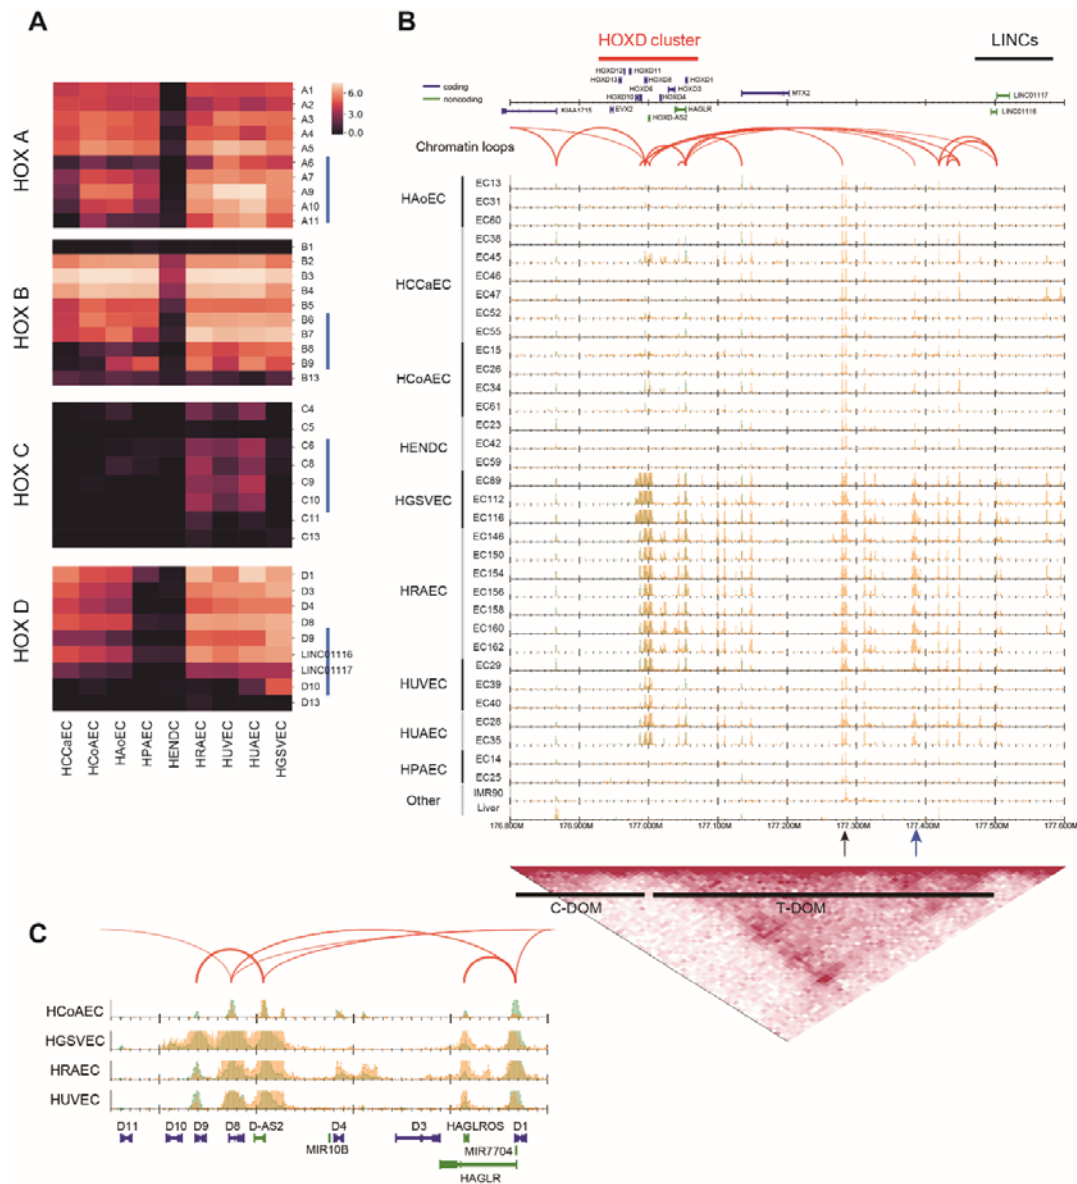

912

913 **Figure 5:** Differential expression of *HOX* genes. (A) Heatmaps visualizing the gene  
 914 expression level (logged Transcripts Per Million (TPM)) of four *HOX* clusters and two  
 915 long non-coding RNAs, LINC01117 (Hotdog) and LINC01116 (Twin of Hotdog). Blue  
 916 vertical bars indicate the 5' *HOX* genes. (B) Read distribution around the *HOXD* cluster  
 917 (chr2: 176.8–177.6 Mbp). Bottom: topological interaction frequency, telomeric domain  
 918 (T-DOM) and centromeric domain (C-DOM) identified by Hi-C data for HUVECs. (C)  
 919 Comparison of read profiles around the *HOXD* region for four EC types.
